# Supplementary material
Source: PubMed Central journal article supplement (PMC3488050)
Supplement: supp_M112.388157_jbc.M112.388157-1.pdf [file supp_M112.388157_jbc.M112.388157-1.pdf]

High selectivity of the  $\gamma$ -Aminobutyric acid transporter (GABA) transporter 2 (GAT-2, SLC6A13) revealed by structure-based approach

**Avner Schlessinger<sup>1,2,4</sup>, Matthias B. Wittwer<sup>1,4</sup>, Amber Dahlin<sup>1,3</sup>, Natalia Khuri<sup>1,2</sup>, Massimiliano Bonomi<sup>1,2</sup>, Hao Fan<sup>1,2</sup>, Kathleen M. Giacomini<sup>1\*</sup>, Andrej Sali<sup>1,2\*</sup>**

<sup>1</sup>Department of Bioengineering and Therapeutic Sciences; <sup>2</sup>California Institute for Quantitative Biosciences, University of California, San Francisco, CA 94158; <sup>3</sup>Present address: Channing Laboratory for Network Medicine, Brigham and Women's Hospital and Harvard Medical School.

<sup>4</sup>Equal contribution

\*To whom correspondence should be addressed: Andrej Sali, E-mail [sali@salilab.org](mailto:sali@salilab.org); Kathleen M. Giacomini, E-mail: [kathy.giacomini@ucsf.edu](mailto:kathy.giacomini@ucsf.edu)

**Template selection.** The structure of LeuT was determined by X-ray crystallography in different conformations, with a variety of ligands (1,2). We selected the template structures (PDB identifier 2A65 (3) and 3F3A (4) for the occluded and outward-facing conformations, respectively) based on the following criteria: (i) highest resolution (1.65 Å and 2 Å), (ii) substrate (leucine)- and inhibitor (tryptophan)-bound, and (iii) an occluded and an outward-facing conformations.

**GAT-2-LeuT alignment.** An initial GAT-2-LeuT alignment was extracted from a comprehensive comparison of the SLC6 family including eukaryotic and prokaryotic members (5). The alignment was corrected with the updated sequence of the active isoform of GAT-2 (April 2011) and was subsequently refined; four long segments distant from the primary binding site (extracellular loop 2, the loop between transmembrane helices 11 and 12, and the N- and C- termini) were excluded from modeling (Fig. S1). The sequence identity between the modeled fraction of GAT-2 and LeuT is 23%.

**Sidechain refinement.** For each one of the initial models generated by MODELLER, the sidechains of the binding site residues were repacked on a fixed backbone using SCWRL4 (6). The coordinates of the sodium ions from these initial models were used as steric constraints for the sidechains. In particular, we ran SCWRL4 on different combinations of residues. For both the occluded and outward-facing models, we ran SCWRL4 on E48 alone, four binding site residues (*ie*, E48, F288, L294, and Q391), or residues located within 4 Å from the coordinates of the ligand in the initial model (*ie*, leucine and tryptophan for the occluded and outward-facing models, respectively). For the outward facing model, we also ran SCWRL4 on an additional residue separately (*ie*, D447), three binding site residues (E48, Q391, and D447), or the whole protein.

**MD simulations.** All MD simulations were performed with GROMACS4 MD code (7). Each model, including pre- or post-sidechain optimization models, was refined using the following MD protocol. The

model was subjected to 10000 steps of conjugate gradient minimization under the Amber99SB-ILDN force field (8,9). To account for the membrane hydrophobic environment, an implicit model for the solvent based on a generalized Born formalism was used. A dielectric constant equal to 2 was used to model the membrane interior. Whenever ions were present in the model, the system was simulated “in vacuum” and coulomb interactions were screened by using a dielectric constant equal to 2. All bond lengths were constrained to their equilibrium values using the LINCS algorithm (10). A time step of 2 fs was adopted. A cutoff of 1.0 nm was used for the Lennard-Jones and the electrostatic interactions.

**Enrichment.** The enrichment factor was defined as:

$$EF_n = \frac{(\text{ligand}_{\text{selected}} / N_n)}{(\text{ligand}_{\text{total}} / N_{\text{total}})} \quad (1)$$

where  $\text{ligand}_{\text{total}}$  is the number of known ligands in a database containing  $N_{\text{total}}$  compounds, and  $\text{ligand}_{\text{selected}}$  is the number of ligands found in a given subset of  $N_n$  compounds (11-13). Additionally, we used the area under the enrichment curve as a measure of virtual screening accuracy (11-13). The enrichment curve can be obtained by plotting the percentage of actual ligands correctly predicted (y-axis) within the top ranked subset of all database compounds (x-axis on logarithmic scale). We calculated the area under the curve (logAUC) of the enrichment plot for  $\Delta x=0.1$ :

$$\log\text{AUC} = \frac{1}{\log_{10} 100 / 0.1} \sum_{0.1}^{100} \frac{\text{ligand}_{\text{selected}}(x)}{\text{ligand}_{\text{total}}} \Delta x \quad \text{where } x = \log_{10} \frac{N_n}{N_{\text{total}}} \quad (2)$$

## SI FIGURE LEGENDS

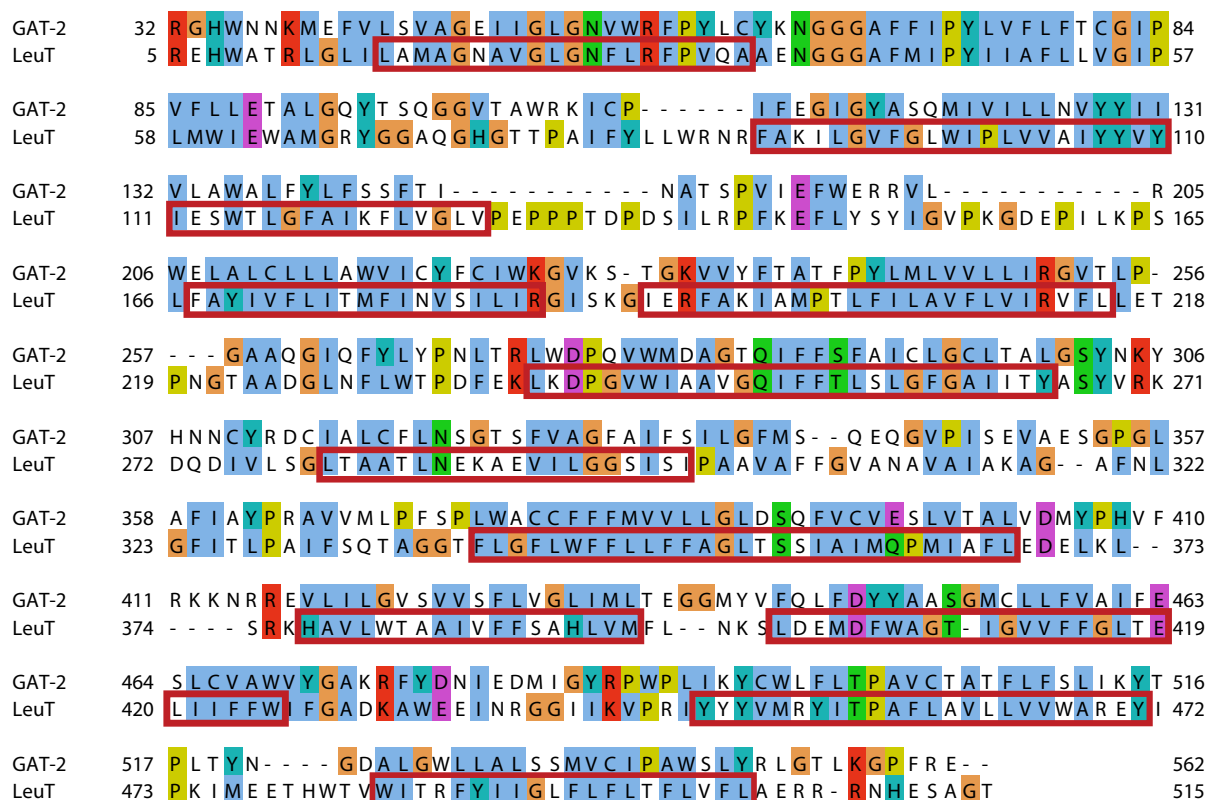

**Fig S1. GAT-2-LeuT alignment.** Putative transmembrane regions (in red rectangles) were obtained from the comprehensive SLC6 study (5), and were originally based on the PDB\_TM database (14). The alignment was corrected and refined with an updated GAT-2 sequence. The LeuT sequence was derived from occluded X-ray structure (*ie*, PDB id 2A65). The sequence alignment was visualized using Jalview (15). The aligned residues were colored based on their type using the “Clustlx” color scheme.

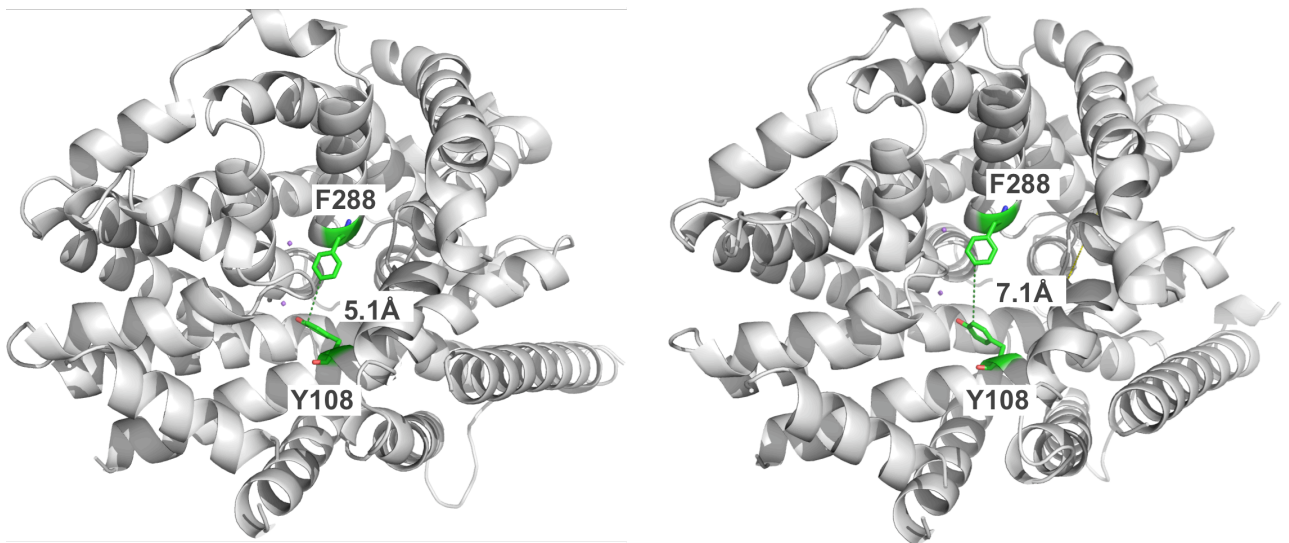

**Fig S2. The extracellular gate.** Top view of the extracellular gate formed by F288 and Y108 (green sticks) in the occluded (left panel) and outward-facing (right panel) conformations. All other GAT-2 residues are illustrated by white ribbons.

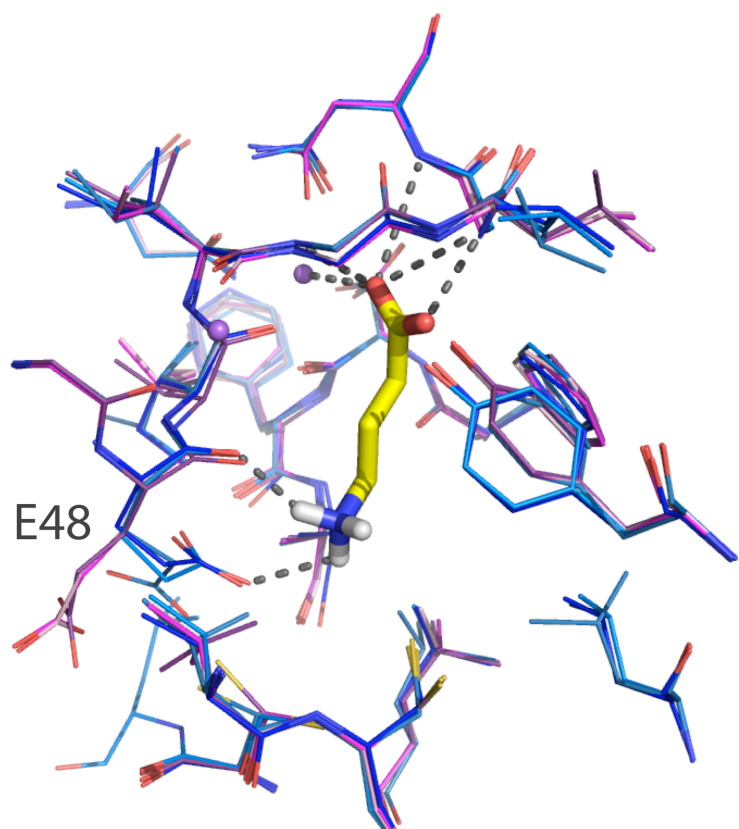

**Fig S3. E48 in various models of GAT-2.** The three occluded models with the best (blue) and worst (pink) enrichment scores are shown. Atoms are illustrated by lines, with oxygen, nitrogen, and hydrogen atoms in red, blue, and white, respectively. The sodium ions Na1 and Na2 are visualized with purple spheres. GABA is depicted in yellow sticks and its hydrogen bonds with GAT-2 in the final refined model (involving E48, G51, G53, N54, and Na1) are shown as dotted gray lines.

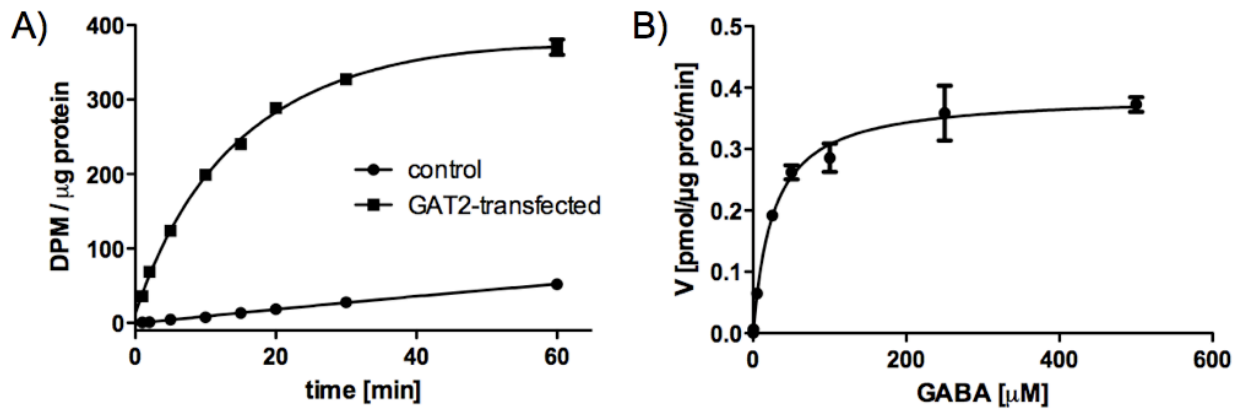

**Fig S4. Time course and uptake kinetics of HEK293-cells transiently transfected with GAT-2.** A) Time course of  $^3\text{H}$ -GABA uptake into HEK293-cells transiently transfected with pcDNA5/FRT-GAT-2 or empty vector (pcDNA5/FRT, control). Uptake was determined after 1, 2, 5, 10, 15, 20, 30, and 60 minutes. The uptake was linear up to 2 minutes. B) Uptake kinetics of GABA into HEK293-cells transiently transfected with pcDNA5/FRT-GAT-2. The  $K_m$  was determined to be 26.2  $\mu\text{M}$ ,  $V_{\text{max}}$  was 0.39 pmol/ $\mu\text{g}$  protein/minute.

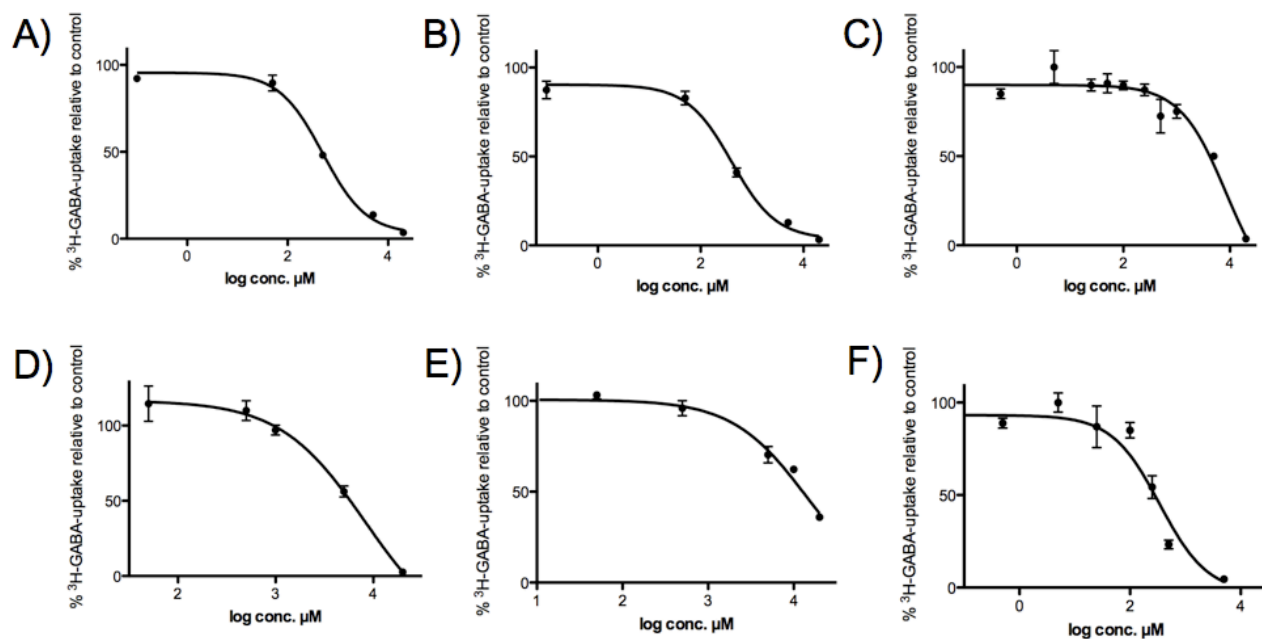

**Fig S5. IC<sub>50</sub> curves for selected compounds.** IC<sub>50</sub> values (in brackets) were determined for selected hits. A) 3-Aminobutanoic acid (499 μM), B) GABOB (402 μM), C) Pyridoxal-5'-phosphate (8.5 mM), D) 5-Aminolevulinic acid (8.2 mM), E) Baclofen (ca. 14 mM), F) Desipramine (344 μM). For baclofen, the solubility limit in the assay buffer was reached at a concentration of 20 mM.

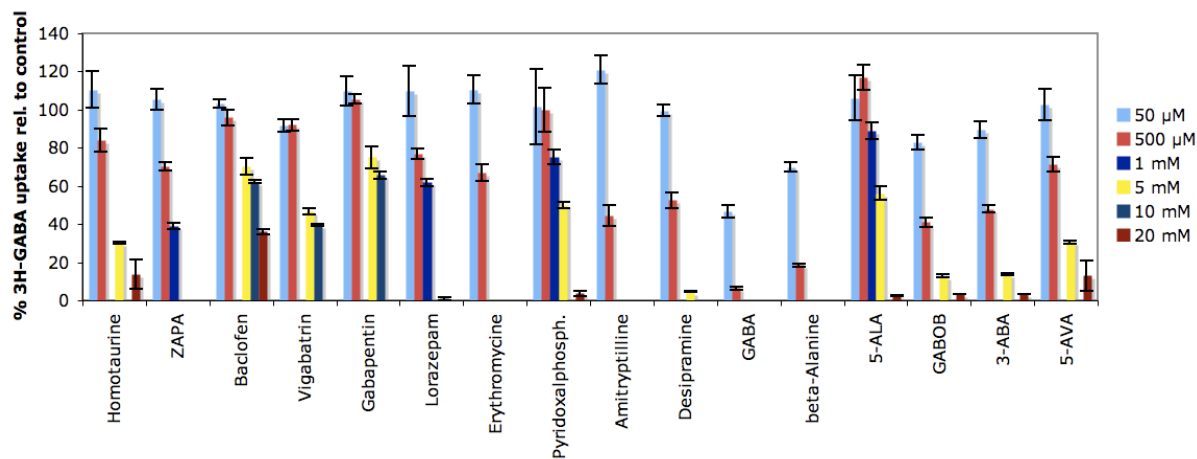

**Fig S6. Additional data points for GAT-2 inhibitors.** The inhibition of  $^3\text{H}$ -GABA uptake was assessed at additional concentrations for compounds that were inhibitors of GAT-2 at 50, 500 or 5000  $\mu\text{M}$ .  $^3\text{H}$ -GABA uptake consistently decreased at higher concentrations up to 20 mM. All data are shown with standard error of the mean (SEM) bars.



TABLES

| Docking screen                               |                                                         |                 |                                                                                       |
|----------------------------------------------|---------------------------------------------------------|-----------------|---------------------------------------------------------------------------------------|
| Name <sup>a</sup>                            | Function <sup>b</sup>                                   | Tc <sup>c</sup> | Sketch <sup>d</sup>                                                                   |
| <b>γ-Amino-β-hydroxybutyric acid (GABOB)</b> | Anticonvulsant                                          | 0.93            | 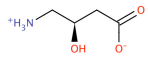   |
| <b>3-Aminobutanoic acid (3-ABA)</b>          | Fragment                                                | 0.87            |    |
| Pregabalin                                   | Anticonvulsant; side effects related to renal excretion | 0.84            |    |
| <b>5-Aminovaleric acid (5-AVA)</b>           | Metabolite (Lysine degradation)                         | 0.84            |    |
| <b>Aminolevulinic acid (5-ALA)</b>           | Antineoplastic                                          | 0.79            |    |
| Amicar                                       | Hemostatic                                              | 0.77            |    |
| <b>Vigabatrin</b>                            | Anticonvulsant                                          | 0.75            |   |
| L-Glutamine                                  | Dietary supplement                                      | 0.72            |  |
| L-Methionine                                 | Amino Acid                                              | 0.61            |  |
| Vitamin U                                    | Gastrointestinal ulceration                             | 0.60            |  |
| Ornidyl                                      | Antineoplastic; Antiprotozoal                           | 0.55            |  |
| Glycylglycine                                | Metabolite                                              | 0.50            |  |
| <b>ZAPA</b>                                  | GABA analog for research                                | 0.40            |  |
| <b>Baclofen</b>                              | Relaxant                                                | 0.36            |  |

|                                   |                                                                         |                       |                                                                                       |
|-----------------------------------|-------------------------------------------------------------------------|-----------------------|---------------------------------------------------------------------------------------|
| <b>Tramiprosate (Homotaurine)</b> | Alzheimer's disease,                                                    | 0.30                  | 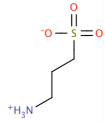   |
| L-DOPA                            | Antiparkinsonian                                                        | 0.30                  |    |
| Cycloserine                       | Antibacterial; side effects include seizures                            | 0.29                  |    |
| Timonacic                         | Hepatic protectant                                                      | 0.28                  |    |
| <b>Lorazepam</b>                  | Relaxant                                                                | 0.26                  |    |
| Acivicin                          | Antineoplastic                                                          | 0.20                  |    |
| L-Tyrosine                        | Precursor of epinephrine, thyroid hormones, and melanin; antidepressant | 0.19                  |   |
| <b>Gabapentin</b>                 | Anticonvulsant                                                          | 0.17                  |  |
| Pemirolast                        | Antipruritics; anti-allergic agent                                      | 0.11                  |  |
| Mesalazine                        | Anti-inflammatory; Crohn's disease                                      | 0.11                  |  |
| <b>Other tested molecules</b>     |                                                                         |                       |                                                                                       |
| <b>Name<sup>a</sup></b>           | <b>Function<sup>b</sup></b>                                             | <b>Tc<sup>c</sup></b> | <b>Sketch<sup>d</sup></b>                                                             |
| Carnitine                         | Metabolite lysine and methionine and nutrition supplement               | 0.73                  |  |
| Glutathione                       | Antioxidant                                                             | 0.36                  |  |

|                             |                                             |      |                                                                                      |
|-----------------------------|---------------------------------------------|------|--------------------------------------------------------------------------------------|
| <b>Erythromycin</b>         | Antibiotic                                  | 0.25 | 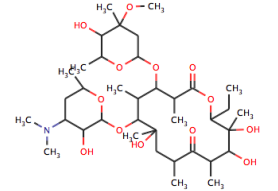  |
| Cyclosporin A               | Immunosuppressant                           | 0.22 |   |
| Rifampicin                  | Antibiotic                                  | 0.20 |   |
| <b>Pyridoxine phosphate</b> | Vitamin B6 metabolism                       | 0.16 |   |
| Creatinine                  | Metabolite and indicator for renal function | 0.14 |  |

**Table S1: Small molecules tested in uptake kinetic assays.**

- Name* is the generic or chemical name of the molecule; names of experimentally confirmed hits are marked in bold font.
- Function* gives the pharmacological function of the drug or the physiological function of the metabolites, when applicable.
- Tc* is the Tanimoto coefficient calculated relying on the Daylight fingerprints. Tc values of < 0.5 suggest that the molecule is chemically different from all known GAT-2 ligands.
- Sketch* provides the 2D sketch of the molecule.

| LeuT | SLC6A13 (GAT-2) | SLC6A12 (BGT1) | SLC6A11 (GAT-3) | SLC6A1 (GAT-1) |
|------|-----------------|----------------|-----------------|----------------|
| S355 | S390            | S395           | S410            | S396           |
| G24  | <b>G51</b>      | G55            | G69             | G63            |
| G26  | G53             | G57            | G71             | G65            |
| V104 | L125            | L129           | L143            | L136           |
| Y108 | Y129            | Y133           | Y147            | Y140           |
| F253 | F288            | F293           | F308            | F294           |
| T254 | S289            | S294           | S309            | S295           |
| N21  | <b>E48</b>      | E52            | E66             | Y60            |
| S256 | A291            | A296           | A311            | G297           |
| F259 | L294            | Q299           | L314            | L300           |
| A261 | C296            | C301           | C316            | S302           |
| I359 | C394            | C399           | C414            | T400           |
| -    | S353            | S358           | S373            | S359           |
| L400 | F443            | F448           | F463            | F447           |
| Y107 | Y128            | Y132           | Y146            | Y139           |
| L29  | W56             | W60            | W74             | W68            |
| I111 | <b>V132</b>     | I136           | I150            | I143           |
| L25  | L52             | L56            | L70             | L64            |
| D404 | D447            | D452           | D467            | D451           |
| T409 | S452            | S457           | S472            | S456           |

**Table S2: Comparison between the four GATs and LeuT**

Residues in close proximity to the S1 binding site are listed. Where residues that were experimentally tested using site-directed mutagenesis are marked in bold font.

## REFERENCES

1. Nyola, A., Karpowich, N. K., Zhen, J., Marden, J., Reith, M. E., and Wang, D. N. (2010) *Curr Opin Struct Biol* **20**, 415-422
2. Krishnamurthy, H., and Gouaux, E. (2012) *Nature* **481**, 469-474
3. Yamashita, A., Singh, S. K., Kawate, T., Jin, Y., and Gouaux, E. (2005) *Nature* **437**, 215-223
4. Singh, S. K., Piscitelli, C. L., Yamashita, A., and Gouaux, E. (2008) *Science* **322**, 1655-1661
5. Beuming, T., Shi, L., Javitch, J. A., and Weinstein, H. (2006) *Mol Pharmacol* **70**, 1630-1642
6. Krivov, G. G., Shapovalov, M. V., and Dunbrack, R. L., Jr. (2009) *Proteins* **77**, 778-795
7. Hess, B., Kutzner, C., van der Spoel, D., and Lindahl, E. (2008) *Journal of chemical theory and computation* **4**, 435-447
8. Lindorff-Larsen, K., Piana, S., Palmo, K., Maragakis, P., Klepeis, J. L., Dror, R. O., and Shaw, D. E. (2010) *Proteins* **78**, 1950-1958
9. Shaw, D. E., Maragakis, P., Lindorff-Larsen, K., Piana, S., Dror, R. O., Eastwood, M. P., Bank, J. A., Jumper, J. M., Salmon, J. K., Shan, Y., and Wriggers, W. (2010) *Science* **330**, 341-346
10. Hess, B. (2007) *Journal of chemical theory and computation* **4**, 116-122
11. Huang, N., Shoichet, B. K., and Irwin, J. J. (2006) *J Med Chem* **49**, 6789-6801
12. Irwin, J. J., and Shoichet, B. K. (2005) *J Chem Inf Model* **45**, 177-182
13. Fan, H., Irwin, J. J., Webb, B. M., Klebe, G., Shoichet, B. K., and Sali, A. (2009) *J Chem Inf Model* **49**, 2512-2527
14. Tusnady, G. E., Kalmar, L., and Simon, I. (2008) *Nucleic acids research* **36**, D234-239
15. Clamp, M., Cuff, J., Searle, S. M., and Barton, G. J. (2004) *Bioinformatics* **20**, 426-427
